# Supplementary material for: Identification of the differential transport pathways of saturated and unsaturated fatty acid esters in hepatocytes
Source: Research Square preprint supplement (doi:10.21203/rs.3.rs-3861110/v1), 2024-02-06
Supplement: Supplementary file 1 [file ce1339effac7c6ac09164965.docx]

**Identification of the differential transport pathways of saturated and unsaturated fatty acid esters in hepatocytes**

Fengwu Chen1,2,#, Aizhen Yang1#, Yue Lu1#, Yuxin Zhang1,3, Jianan Bu1, Runlin Guo1, Yue Han4, Depei Wu4,*, Yi Wu1,4,*

**Supplementary Materials:**

- Supplementary Figures (1-5)
- Supplementary Tables (1-4)

**Figure S1**


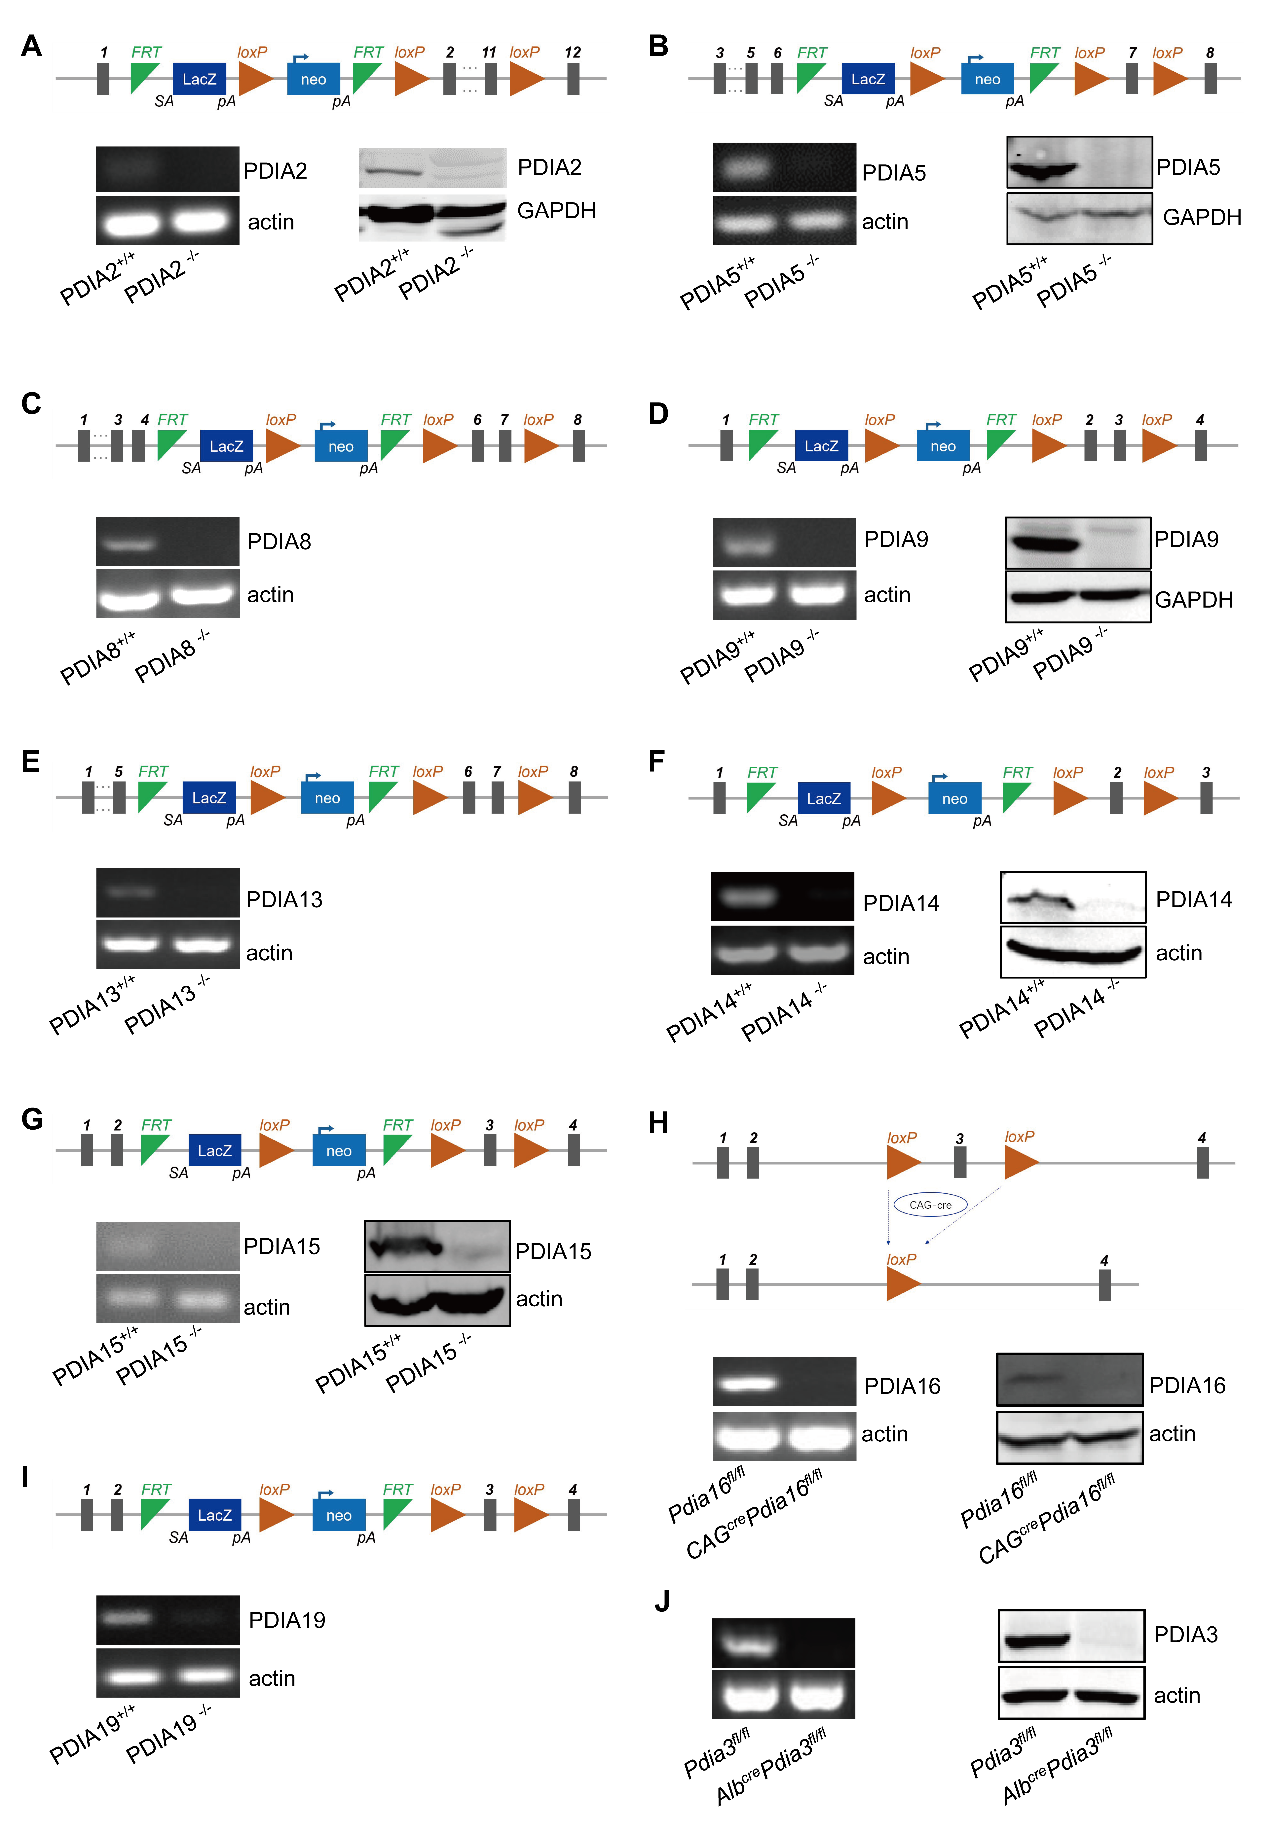


**Figure S1. Generation and characterization of 10 strains of PDIs-knockout mice.** Strategies for the construction of *Pdia2-/-* (A), *Pdia5-/-* (B), *Pdia8-/-* (C), *Pdia9-/-* (D), *Pdia13-/-* (E), *Pdia14-/-* (F), *Pdia15-/-* (G), *CAG-cre/Pdia16fl/fl* (H), and *Pdia19-/-* (I) mice. Total RNA extracted from livers of PDIs-knockout and control mice was converted to cDNA by reverse transcription (RT), and the cDNA was analyzed by semiquantitative reverse transcription-polymerase chain reaction (RT-PCR) with indicated primers (Table S3) on a 7500 Real-time PCR system. Actin was used as an internal control. Expressions of PDIA5 (B), PDIA9 (D), PDIA14 (F), PDAI15 (G), PDIA16 (H), and PDIA3(J) protein in livers were deternmined by Western blotting. Representative image of three independent experiments is shown.

**Figure S2**


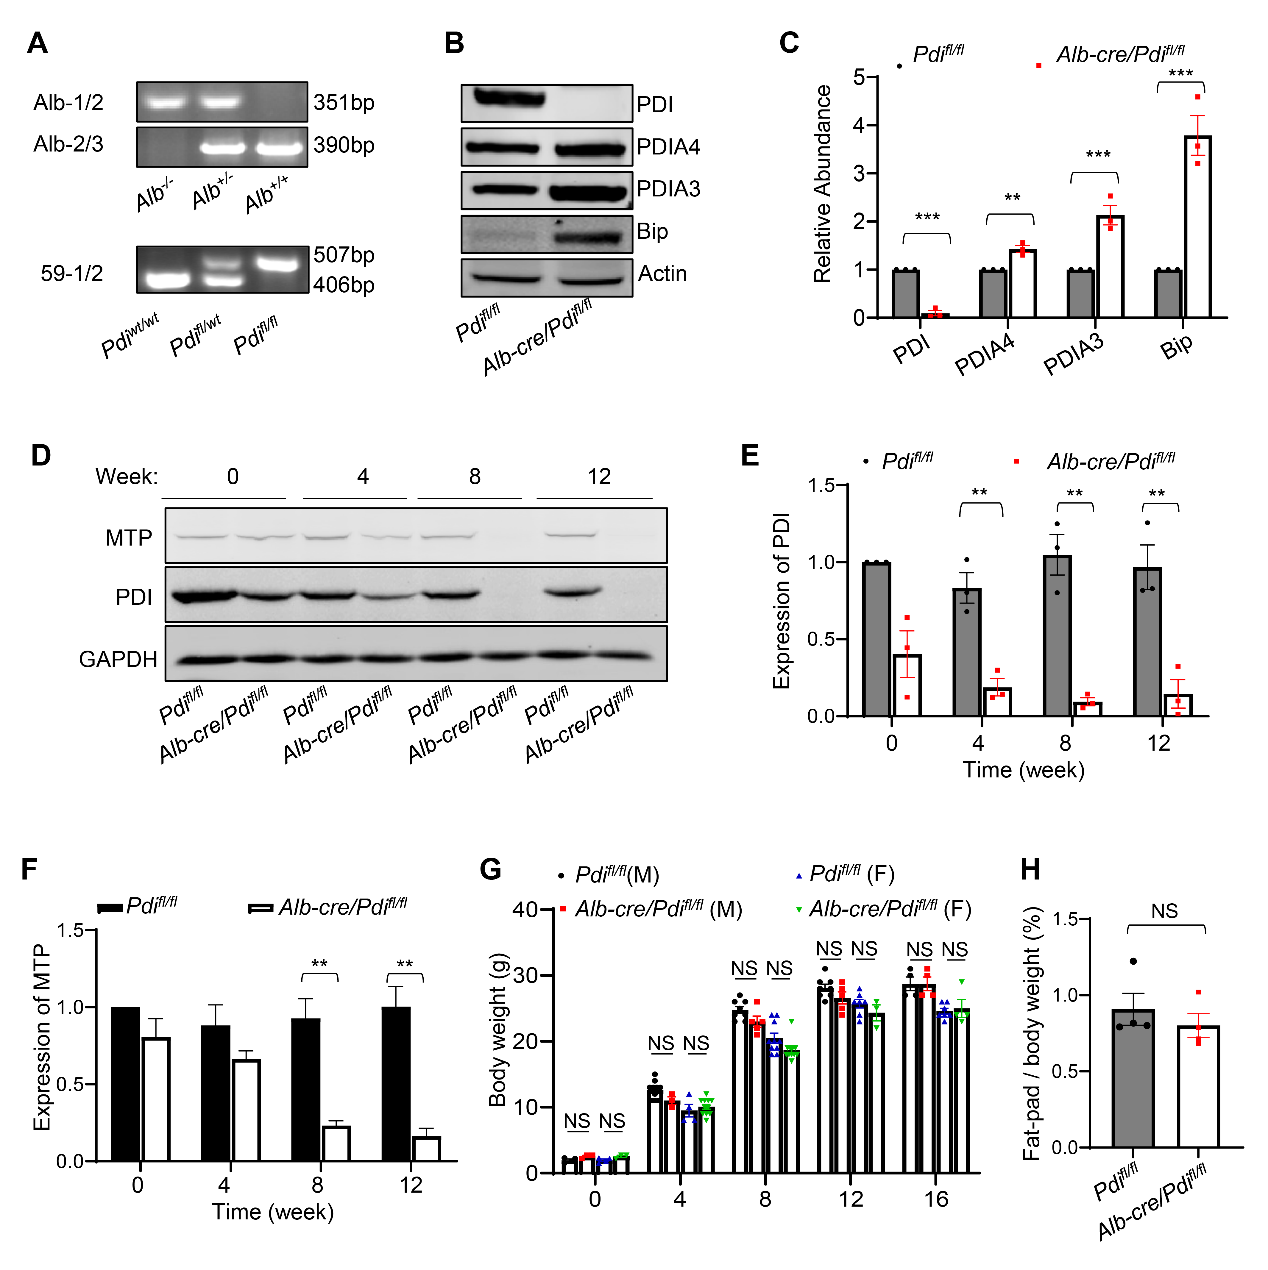


**Figure S2. Characterization of hepatocyte-specific PDI-deleted mice.** (A) Genotyping of *Alb-cre/Pdifl/fl* mice was analyzed by polymerase chain reaction (PCR) of tail genomic DNA with primers for the *Pdifl/fl* alleles (507 bp) and *Alb-cre* alleles (351 bp). (B-C) Expression of PDI protein was eliminated in the liver of *Alb-cre/Pdifl/fl* mice. (B) Lysates of livers isolated from *Pdifl/fl* and *Alb-cre/Pdifl/fl*mice were resolved by SDS-PAGE, transferred onto a PVDF membrane and immunoblotted with indicated antibodies. (C) Relative abundance of PDI, ERp57, ERp72, and Bip in each sample was quantitated by the band intensity determined with ImageJ software. n = 3 for WT, n = 3 for KO. Data are presented as mean ± SEM, **P < 0.01 and ****P < 0.0001 (two-tailed Student’s t test). (D-F) Expressions of PDI and MTP proteins gradually decreased over time in the livers of *Alb-cre/Pdifl/fl* mice. (D) Livers isolated from *Pdifl/fl* and *Alb-cre/Pdifl/fl* miceat different weeks were lysed and analyzed with SDS-PAGE and Western blotting with anti-PDI and anti-MTP antibodies, and GAPDH was used as a loading control. Relative abundance of PDI (E) and MTP (F) in each sample was quantitated by the band intensity determined with ImageJ software. n = 3 for WT, n = 3 for KO. Data are presented as mean ± SEM, **P < 0.01 (two-tailed Student’s t test). (G) Average body weight of *Alb-cre/Pdifl/fl*and *Pdifl/fl*mice at different weeks. Statistical analysis of male and female mice was performed separately. The number of each mouse was determined by counting a dot. Data are presented as mean ± SEM, NS, not significant. (H) The ratio of fat-pad weight to body weight of *Alb-cre/Pdifl/fl*mice (n = 4) and *Pdifl/fl*mice (n = 4). Data are presented as mean ± SEM, NS, not significant.

**Figure S3**


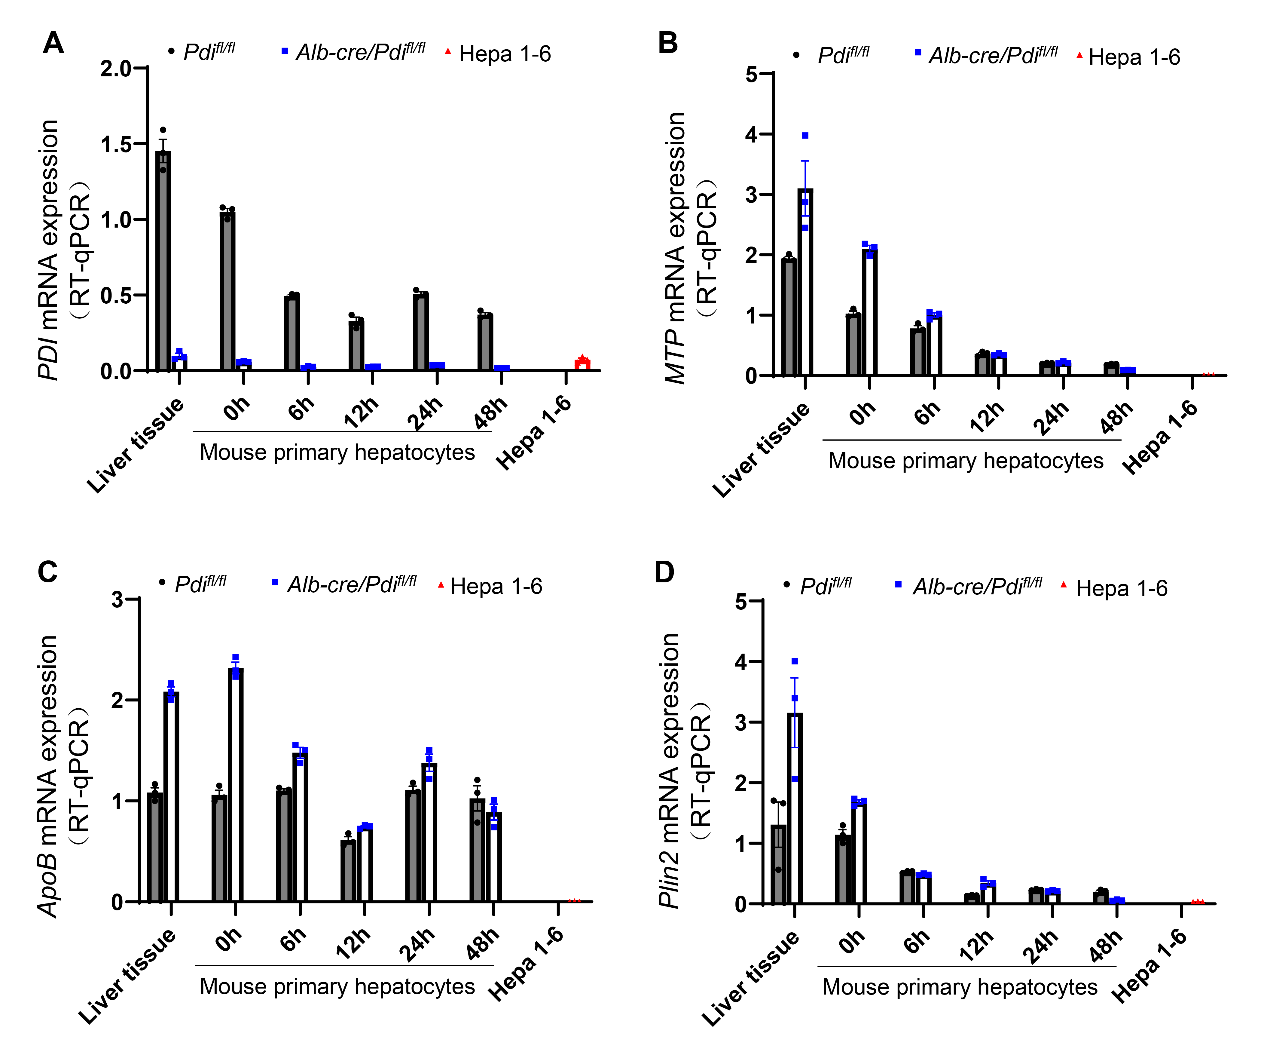


**Figure S3. Gene expression profiles quickly change in cultured primary mouse hepatocytes**. Total RNA was extracted from the livers of *Pdifl/fl* and *Alb-cre/Pdifl/fl* mice, primary mouse hepatocytes were cultured for the indicated times (hours), and Hepa 1-6 cells were converted to cDNA by reverse transcription (RT). The cDNA was analyzed by quantitative reverse transcription PCR (RT-qPCR) with the indicated primers for *Pdi*, *ApoB*, *Mttp*, and *Plin2* genes on a 7500 Real-time PCR system.

**Figure S4**


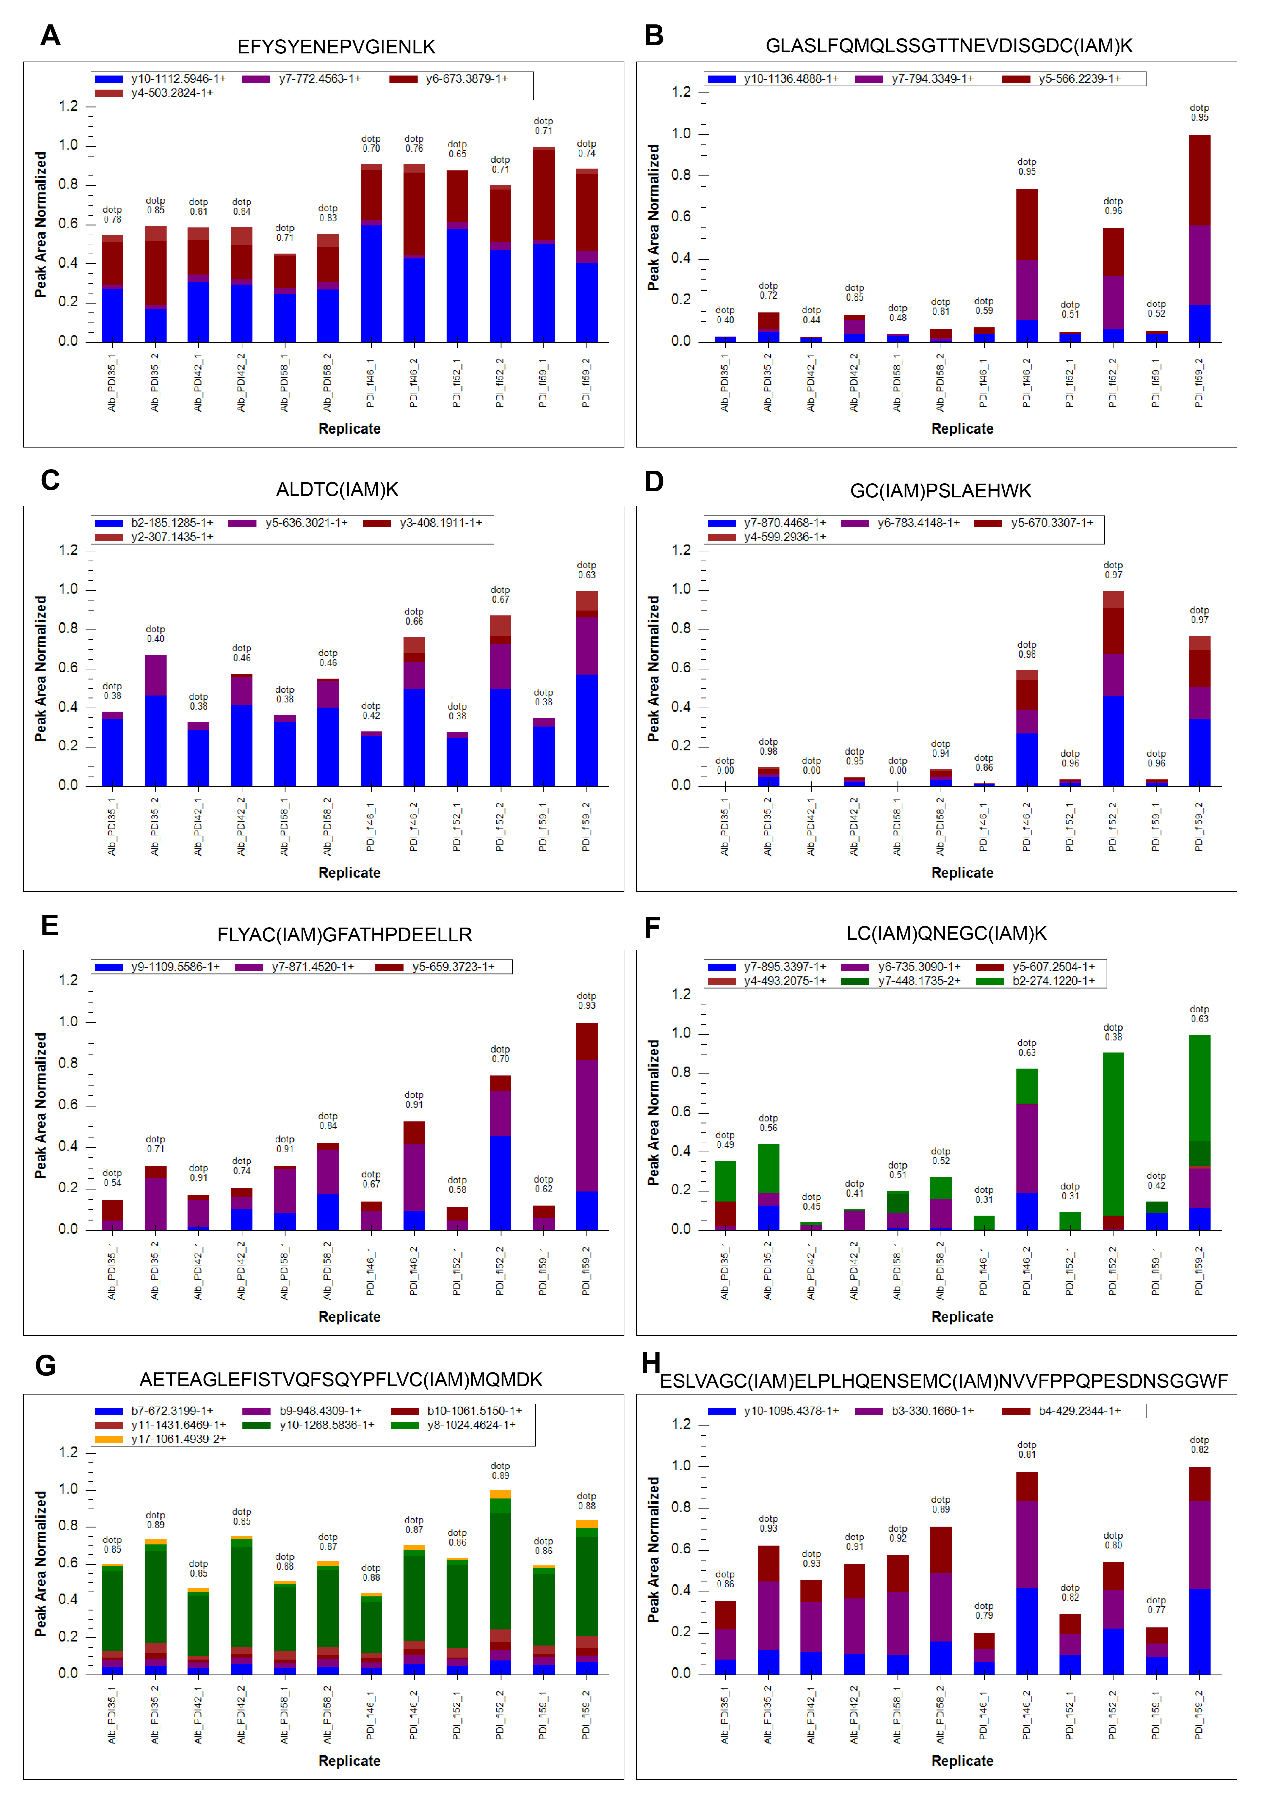


**Figure S4: Peak area distribution of the qualified fragment ions of targeted peptides**. Liver lysates of *Pdifl/fl* and *Alb-cre/Pdifl/fl* mice were alkylated with IAM and analyzed using PRM-MS, and 8 peptides of MTP were systematically detected by spectral matching using a previously prepared reference library. The traces of the qualified b- and y-type fragment ions of each peptide were extracted, and the peak areas were determined. The abundance of endogenous peptides was determined by summing the peak areas of fragment ions of the corresponding peptide.

**Figure S5**


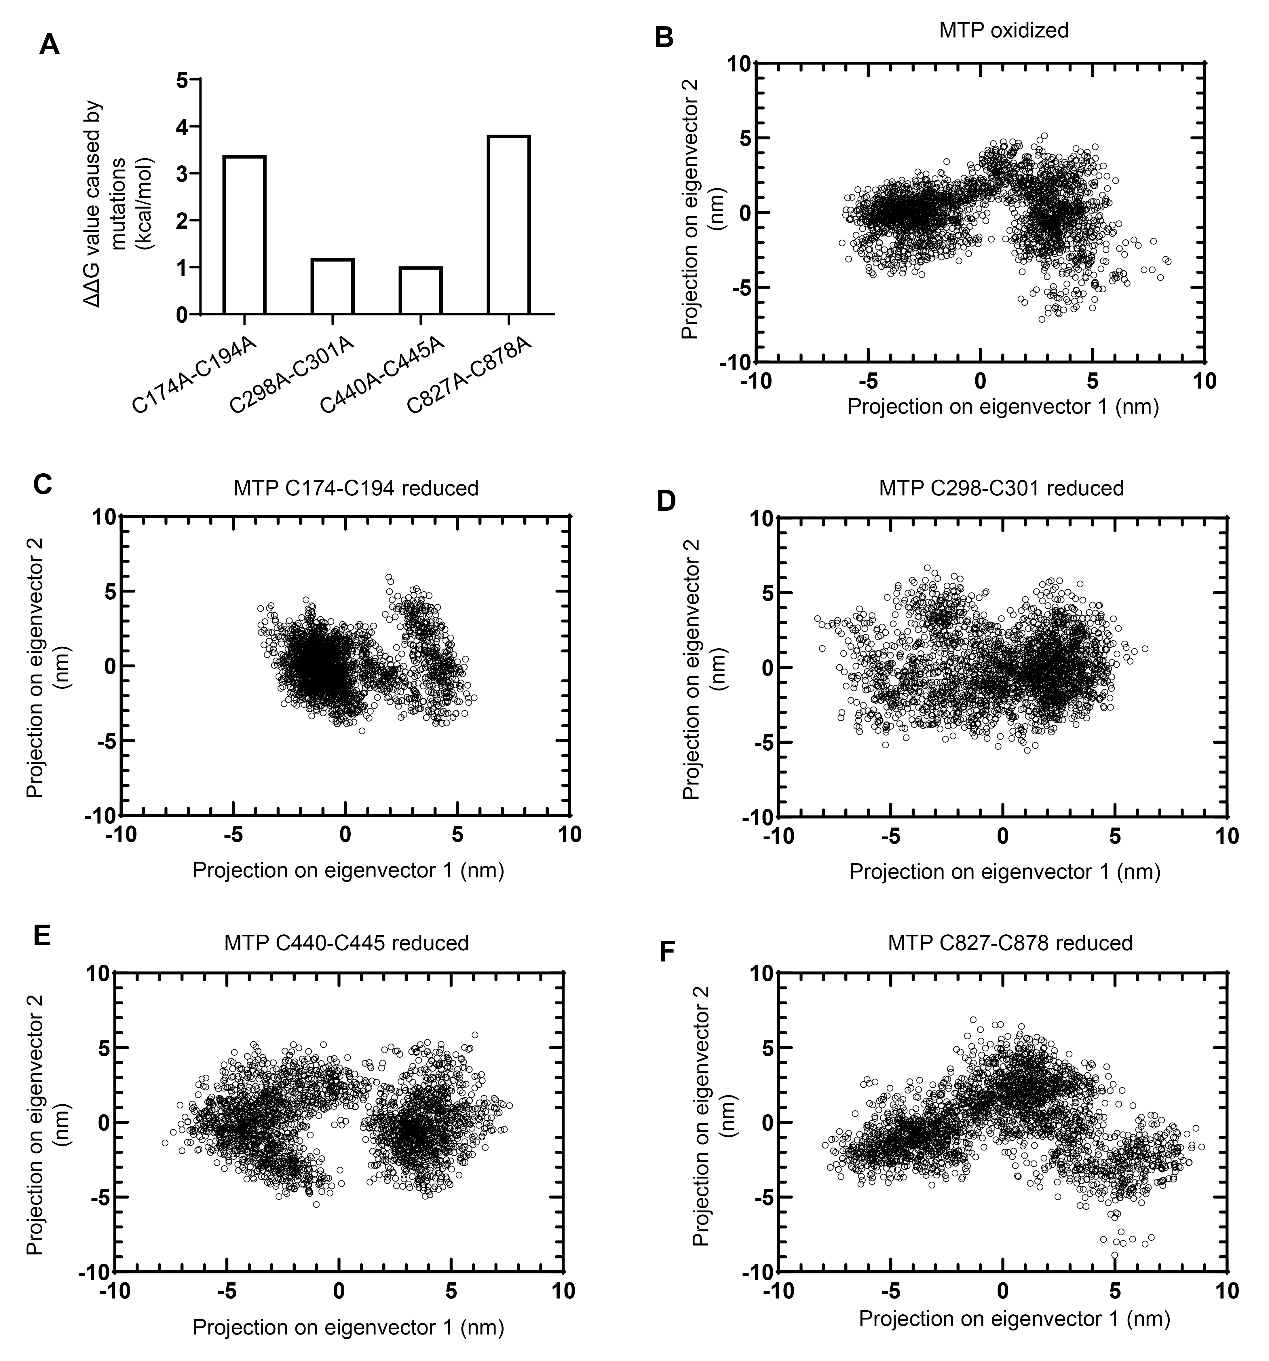


**Figure S5. Every disulfide bond of MTP is needed for its structural stability and expression.** (A) The changes in the Gibbs free energy (ΔΔG) values for MTP mutants with FoldX 3.0. (B-F) Conformational distribution of MTP proteins with an intact (oxidized) (B) or missing (reduced) Cys174-Cys194 (C), Cys298-Cys301 (D), Cys440-Cys445 (E), and Cys827-Cys878 (F) disulfide bonds, projected along two major conformational eigenvectors obtained from molecular dynamics simulations which started from the MTP-PDI complex conformation (PDB code 6I7S), supporting the notion that the redox state of each disulfide bond has significant structural implications.

**Table S1. Plasma biochemical parameters of hepatocyte PDI-deleted mice and control mice.** Plasma was isolated from 12-hour-fasted *Alb-cre/Pdifl/fl* (n=6)and *Pdifl/fl* (n=6) mice, and subsequently analyzed via a fully automatic biochemical analyzer. Two-tailed Student’s t-tests were used to calculate p-values, and the data are shown as mean ± SEM.

| Parameters | *Pdifl/fl* | *Alb-cre/Pdifl/fl* | P value |
| --- | --- | --- | --- |
| Alanine Aminotransferase (ALT), IU/L | 31.17±2.74 | 36.00±3.84 | 0.3294 |
| Aspartate Aminotransferase (AST), IU/L | 61.00±11.36 | 55.00±7.84 | 0.6731 |
| Total Protein (TP), g/L | 39.53±2.16 | 40.27±2.41 | 0.8251 |
| Albumin (ALB), g/L | 25.43±1.66 | 26.75±1.51 | 0.5702 |
| Total Bilirubin (TBIL), μmol/L | 0.72±0.12 | 0.68±0.14 | 0.8585 |
| Glucose (GLU), mmol/L | 8.26±1.09 | 2.96±0.51 | 0.0013 |
| Blood Urea Nitrogen (BUN), mmol/L | 11.70±1.32 | 13.28±1.20 | 0.3941 |
| Lactate Dehydrogenase (LDH), IU/L | 206.20±40.49 | 192.70±33.09 | 0.8015 |
| Cholesterol (CHOL), mmol/L | 2.23±0.25 | 0.61±0.13 | 0.0002 |
| Triglyceride (TG), mmol/L | 0.30±0.03 | 0.06±0.02 | <0.0001 |
| High-density Lipoprotein (HDL), mmol/L | 1.63±0.16 | 0.50±0.10 | 0.0002 |
| Low Density Cholesterol (LDL), mmol/L | 0.32±0.07 | 0.07±0.01 | 0.0057 |

**Table S2. Spectral library of alkylated synthesized peptides.** Eight peptides of MTP were synthesized and alkylated with iodoacetamide, and subsequently analyzed using DDA mode of mass spectrometry. The raw files were searched by using a quantitative proteomics software package (MaxQuant 1.6.15.0), and the processed data were imported into Skyline 20.1 software to build a spectral library as follows.

| Cysteine | Alkylated synthetic peptides | Mass [m/z] | CS [z] | Start [min] | End [min] | NCE |
| --- | --- | --- | --- | --- | --- | --- |
| None (Control) | EFYSYENEPVGIENLK | 965.957088 | 2 | 18.181 | 24.181 | 27 |
| C174 | GLASLFQMQLSSGTTNEVDISGDC[IAM]K | 886.751037 | 3 | 19.844 | 25.844 | 27 |
| C194 | ALDTC[IAM]K | 354.173264 | 2 | 3.4986 | 9.4986 | 27 |
| C301 | GC[IAM]PSLAEHWK | 395.522085 | 3 | 8.596 | 14.596 | 27 |
| C397 | FLYAC[IAM]GFATHPDEELLR | 680.327892 | 3 | 24.941 | 30.941 | 27 |
| C440-C445 | LC[IAM]QNEGC[IAM]K | 504.715501 | 2 | 2.3451 | 8.3451 | 27 |
| C827 | AETEAGLEFISTVQFSQYPFLVC[IAM]MQMDK | 1090.511629 | 3 | 23.289 | 29.289 | 27 |
| C866, C878 | ESLVAGC[IAM]ELPLHQENSEMC[IAM]N  VVFPPQPESDNSGGWF | 1354.264394 | 3 | 19.4 | 25.4 | 27 |

| **Table S3: Sequences of primers used for genotyping and quantitative PCR** | | | | |
| --- | --- | --- | --- | --- |
|  | | | | |
| **Genes** | **Forward** | **Reverse** | |
| **Genotyping** |  |  | |
| Alb-cre 1/2 | TTGGCCCCTTACCATAACTG | TGCAAACATCACATGCACAC | |
| Alb-cre 2/3 | TTGGCCCCTTACCATAACTG | GAAGCAGAAGCTTAGGAAGATGG | |
| PDI flox 1/2 | TCTGGAAAAGGAAGTCCAACCGAGA | AAGTCTCCTCAAGGAAGCCAGGGAC | |
| **Quantitative PCR** |  |  | |
| PDI | CTCGACAAAGATGGGGTTGT | GCAAGAACAGCAGGATGTGA | |
| PDIA2 | AGAATGGAAACCGCACAAAC | GACACCTTCCTCATCCTCCA | |
| PDIA3 | TGGTGTGGCCACTGTAAGAA | TTTAATTCACGGCCACCTTC | |
| PDIA5 | GGGAAGAACAGCAGACAAGC | TCTTACAGTGTGGGCACCAA | |
| PDIA8 | TCTGCCTCTTTCGACTGGTT | TGCGCATGCTCTCTTCATAC | |
| PDIA9 | CCTGAAGATCATGGGGAAGA | TGGTCACAGCTCCTCCTTCT | |
| PDIA13 | GTGTATTGATGGTGCTTTCTCT | GTGCTCCTATTCTCCCTTTC | |
| PDIA14 | GGCTGATTGTTCTCCTTAGG | TCTCAGAGCCTTCCGATG | |
| PDIA15 | AAAGGAATTCCCAGGCTTGT | CCGTTGTGTTCTCCCACTTT | |
| PDIA16 | TCTTGGTGTGGAGCCTGCAAAG | CATCAGGGCTGAAGTCTTCATCC | |
| PDIA19 | GCTGGGGTCTTGGATTTTT | CGGCTCTCACTTTTCCTTTG | |
| ApoB | TTGGCAAACTGCATAGCATCC | TCAAATTGGGACTCTCCTTTAGC | |
| ApoE | GACCCAGCAAATACGCCTG | CATGTCTTCCACTATTGGCTCG | |
| ApoC1 | TCCTGTCCTGATTGTGGTCGT | CCAAAGTGTTCCCAAACTCCTT | |
| ApoC3 | TACAGGGCTACATGGAACAAGC | CAGGGATCTGAAGTGATTGTCC | |
| CideB | AACCCCAGTGACTTACTCAGG | AGACACGGAAAGGTCGCTG | |
| ADRP | GAGATGGCAGAGAACGGTGT | AGCCCCTTACAGGCATAGGT | |
| MTP | ATACAAGCTCACGTACTCCACT | TCTCTGTTGACCCGCATTTTC | |
| ACC1 | GTTCTGTTGGACAACGCCTTCAC | GGAGTCACAGAAGCAGCCCATT | |
| FASN | CACAGTGCTCAAAGGACATGCC | CACCAGGTGTAGTGCCTTCCTC | |
| DGAT1 | GGTTCCGTGTTTGCTCTGGCAT | CCACTGACCTTCTTCCCTGTAG | |
| DGAT2 | CTGTGCTCTACTTCACCTGGCT | CTGGATGGGAAAGTAGTCTCGG | |
| SCD1 | GCAAGCTCTACACCTGCCTCTT | CGTGCCTTGTAAGTTCTGTGGC | |
| Actin | CATTGCTGACAGGATGCAGAAGG | TGCTGGAAGGTGGACAGTGAGG | |
| **FLAG tag** |  |  | |
| MTTP-FLAG F | TACAAGGATGACGACGATAAGTGAATCTAGAGCGGCCGCC | | |
| MTTP-FLAG R | ATCGTCGTCATCCTTGTAATCAAAACCATCCGCTGGAAGTACTA | | |
| **Site mutation** |  | |  |
| MTTP-C174A | GTAGATATCTCTGGAAATGCTAAAGTGACCTACCAG | | |
| MTTP-C194A | TAAGGCCTTGGATTCAGCCAAAATAGCGAGGTCT | | |
| MTTP-C440A | CACTTGTCAGAAAGTTGGCTCAGAATGAAGGCTGC | | |
| MTTP-C445A | GCTCAGAATGAAGGCGCCAAACTCAAAGCAGTAG | | |
| MTTP-C298A | GTCTTCCAGAGCCACGCTAAAGGATGTCCTTCTC | | |
| MTTP-C301A | AGCCACGCTAAAGGAGCTCCTTCTCTCTCGGA | | |
| MTTP-C827A | AGTACCCATTCTTAGTTGCCATGCAGATGGACAAG | | |
| MTTP-C878A | AGAGAACTCAGAGATGGCCAAAGTGGTGTTTGCC | | |
| MTTP-C397A | GAGGTTTCTCTATGCCGCTGGATTTGCTTCTCATC | | |
| MTTP-C866A | AAGCGTATTAGCAGGAGCTGAATTCCCGCTCCA | | |

**Table S4: Key resources**

| REAGENT or RESOURCE | SOURCE | IDENTIFIER |
| --- | --- | --- |
| **Antibodies** |  |  |
| Rabbit anti-PDI antibody | Abclonal | Cat#A19239 |
| Rabbit anti-PDIA3 antibody | This paper | 1 |
| Rabbit anti-PDIA5 antibody | Proteintech | Cat#15545-1-AP, RRID:AB_2160995 |
| Rabbit anti-PDIA9 antibody | Abcam | Cat#ab11420 , RRID:AB_298025 |
| Rabbit anti-PDIA14 antibody | Abcam | Cat#ab174276 |
| Rabbit anti-PDIA15 antibody | Proteintech | Cat#19834-1-AP, RRID:AB_10644285 |
| Rabbit anti-PDIA16 antibody | Abcam | Cat#ab134938 |
| Mouse anti-Bip antibody | [BD](https://www.cellsignal.com/) | Cat#610979, RRID:AB_398292 |
| Rabbit anti-APOB antibody | Sigma-Aldrich | Cat#AB742, RRID:AB_11213353 |
| Mouse anti-ApoE antibody | Santa Cruz | Cat#sc-393302 |
| Rabbit anti-apoC3 antibody | Abcam | Cat#ab55984, RRID:AB_879561 |
| Rabbit anti-CideB antibody | Multi Science | Cat#ab32233 |
| Rabbit anti-ADRP antibody | Proteintech | Cat#15294-1-AP, RRID:AB_2878122 |
| Mouse anti-MTP antibody | BD Biosciences | Cat#612022, RRID:AB_399417 |
| Mouse anti-FLAG M2 antibody | Sigma | Cat#F1804-200UG, RRID:AB_262044 |
| Rabbit anti-ACC antibody | Cell Signaling Technology | Cat#3662, RRID:AB_2219400 |
| Rabbit anti-FASN antibody | Abcam | Cat#ab22759, RRID:AB_732316 |
| Rabbit anti-SCD1 antibody | Cell Signaling Technology | Cat#2794, RRID:AB_2183099 |
| Rabbit anti-Actin antibody | Abclonal | Cat#AC026, RRID:AB_2768234 |
| Rabbit anti-GAPDH antibody | [Cell Signaling Technology](https://www.cellsignal.com/) | Cat#14C10, RRID:AB_10693448 |
| **Chemicals** |  |  |
| Tyloxapol | Sigma-Aldrich | Cat#T8761 |
| MG132 | Sigma-Aldrich | Cat#M8699 |
| 3-Methyladenine | Sigma-Aldrich | Cat#M9281 |
| Trifluoroacetic acid | Sigma-Aldrich | Cat#76-05-1 |
| Acetonitrile | Fisher Chemical | Cat#75-05-8 |
| Formic acid | Fluka | Cat#64-18-6 |
| Iodoacetamide (IAM) | Sigma | Cat#144-48-9 |
| N-ethylmaleimide (NEM) | Thermo scientific | Cat#23030 |
| TCEP | Thermo scientific | Cat#20490 |
| Urea | Sigma | Cat#57-13-6 |
| HEPES | Sigma-Aldrich | Cat#7365-45-9 |
| EGTA | Sigma-Aldrich | Cat#13368-13-3 |
| KBr | Sigma-Aldrich | Cat#746444 |
| **Critical Commercial Assays** |  |  |
| BCA Protein Assay Kit | Beyotime | Cat#P0011 |
| Triglyceride Assay Kit | EnzyChrom | Cat#ETGA-200 |
| Cholesterol Assay KIT | EnzyChrom | Cat#ECCH-100 |
| Free Fatty Acid Quantitation KIT | Sigma-Aldrich | Cat#MAK044 |
| MTP Activity Assay Kit | Sigma-Aldrich | Cat#MAK110 |
| **Others** |  |  |
| OptiPrepTM | Alere Technologies AS | Cat#as1114542 |
| Protease Inhibitor Cocktail | Roche | Cat#04693132001 |
| Trypsin | Promega | Cat#V5111 |
| Streptavidin Agarose Resins | Thermo Fisher | Cat#20347 |
| Protein G beads | Genscript | Cat#L00209 |
| H&E staining kit | Servicebio | Cat#G1005 |
| Oil Red O staining solution | Servicebio | Cat#G1016 |
| Fixative for TEM | Servicebio | Cat#G1102 |
| EMbed-812 Kit for EM Embedding | SPI | Cat#90529-77-4 |
| OCT Compound | Sakura | Cat#4583 |
| BODIPY 493/503 | Thermo Fisher | Cat#D3922 |
| DAPI | Servicebio | Cat#G1012 |
| Collagen I, Rat Tail | Corning | Cat#354236 |
| Collagenase Type IV | Gibco | Cat#17104-019 |
| Hank’s Balanced Salt Solution | Gibco | Cat#14170146 |
| DMEM, low glucose, pyruvate | Gibco | Cat#11885084 |
| DMEM/F-12 | Gibco | Cat#11320033 |
| Fetal bovine serum (FBS) | Gibco | Cat#10099-141 |
| Penicillin/streptomycin | Beyotime | Cat#c0222 |
| 1st Strand cDNA Synthesis Kit | Vazyme | Cat#R312-02 |
| SYBR qPCR Master Mix | Vazyme | Cat#Q711-02 |
| Ultra-One Step Cloning Kit | Vazyme | Cat#C115-01 |
| Fast Mutagenesis Kit V2 | Vazyme | Cat#C214-01 |
| GelRed | Biotium | Cat#41003 |
| Lipofectamine 3000 | Thermo Fisher | Cat#L3000008 |
| **Plasmid** |  |  |
| hMTTP expression plasmid | Sino Biological | Cat#HG17688-UT |

1. Wang, L. et al. Platelet-derived ERp57 mediates platelet incorporation into a growing thrombus by regulation of the alphaIIbbeta3 integrin. *Blood* **122**, 3642-3650 (2013).
